# Supplementary material for: Alterations of Nutritional Status in Children and Adolescents with Acute Lymphoblastic Leukemia
Source: MDPI journal article supplement (doi:10.3390/children11030334), 2024-03-11
Supplement: s1 [file s1]

Table S1: Patients' characteristics and treatment course

| Patient | Age | Sex | Protocol   | Risk | BW1  | BH1 | BW2  | BH2 | BW3  | BH3 | BW4  | BH4 | Duration | Adverse events                                                                                                                                                              | Nutritional intervention | Additional comments                                                            |
|---------|-----|-----|------------|------|------|-----|------|-----|------|-----|------|-----|----------|-----------------------------------------------------------------------------------------------------------------------------------------------------------------------------|--------------------------|--------------------------------------------------------------------------------|
| 1       | 7.6 | F   | ALL IC-BFM | IR   | 25.5 | 136 | 30.4 | 136 | 32.5 | 138 | 30.5 | 146 | 7        | I: mild mucositis; RI: febrile neutropenia, seizures                                                                                                                        | DC                       |                                                                                |
| 2       | 3.8 | M   | ALL IC-BFM | SR   | 16.2 | 104 | 19   | 104 | 20   | 104 | 21   | 112 | 6        | I: mild mucositis; C: transaminitis; RE: mild mucositis, transaminits, febrile neutropenia                                                                                  | DC                       |                                                                                |
| 3       | 0.8 | M   | Interfant  | N/A  | 9.5  | 72  | 9.4  | 72  | 10.7 | 75  | 12.4 | 82  | 8        | I: febrile neutropenia, urinary infection; C: sepsis, IFI; RE: febrile neutropenia                                                                                          | DC, EN                   | Congenital anal atresia; relapse; death due to IFI during the 2nd line therapy |
| 4       | 4.2 | F   | ALL IC-BFM | IR   | 17   | 110 | 18   | 110 | 18   | 110 | 20.8 | 116 | 7        | I: mild mucositis; EI: febrile neutropenia, pneumonia; C: mild transaminitis; RI: febrile neutropenia, pneumonia, IFI                                                       | DC                       | ICU due to pneumonia                                                           |
| 5       | 5.2 | F   | ALL IC-BFM | HR   | 23.4 | 120 | 20.6 | 120 | 27.5 | 122 | 30   | 124 | 12       | I: febrile neutropenia, sepsis, IFI, mucositis; EI: febrile neutropenija, sepsis, IFI, Clostridium enterocolitis; C: febrile neutropenia, seizures, RI: febrile neutropenia | DC, EN, PN               | ICU due to sepsis and seizures                                                 |
| 6       | 2.5 | F   | ALL IC-BFM | IR   | 13   | 94  | 14.4 | 97  | 15.6 | 97  | 16.8 | 106 | 7        | I: febrile neutropenia, mild mucositis, hypoglycemia; RI: febrile neutropenia, sepsis, ileus, pancreatitis                                                                  | DC, EN, NGS              | ICU due to sepsis                                                              |

|    |     |   |            |     |      |     |      |     |      |     |     |     |   |                                                                                                                                                                                                                                        |                 |                                                                                             |
|----|-----|---|------------|-----|------|-----|------|-----|------|-----|-----|-----|---|----------------------------------------------------------------------------------------------------------------------------------------------------------------------------------------------------------------------------------------|-----------------|---------------------------------------------------------------------------------------------|
| 7  | 3.5 | M | ALL IC-BFM | IR  | 13.1 | 102 | 14.6 | 103 | 17   | 103 | *   | *   | 7 | IE: febrile neutropenia; C: febrile neutropenia, urinary infection; RI: febrile neutropenia, urinary infection                                                                                                                         | DC              |                                                                                             |
| 8  | 1.3 | F | ALL IC-BFM | IR  | 10.5 | 78  | 10.7 | 78  | 10.7 | 82  | N/A | N/A | 6 | I: acute tumor lysis syndrome, febrile neutropenia, sepsis, mild mucositis; EI: febrile neutropenia; C: febrile neutropenia, Clostridium enterocolitis, IFI, mild mucositis, transaminitis; RI: febrile neutropenia, sepsis, pneumonia | DC, EN, PN, NGS | ICU due to sepsis; death due to multiorgan failure at the end of re-induction               |
| 9  | 2.2 | M | ALL-IC BFM | N/A | 13   | 91  | N/A  | N/A | N7A  | N/A | N/A | N/A | 1 | I: febrile neutropenia, sepsis, pancreatitis                                                                                                                                                                                           | DC, EN, NGS     | ICU due to sepsis and pancreatitis; death due to multiorgan failure at the end of induction |
| 10 | 5.2 | F | ALL IC-BFM | SR  | 20.7 | 119 | 21.8 | 119 | 23.8 | 124 | *   | *   | 6 | I: liver injury; EI: febrile neutropenia, sepsis, mild pancreatitis; RI: febrile neutropenia, urinary infection, transaminitis                                                                                                         | DC              | ICU due to sepsis                                                                           |
| 11 | 8.6 | M | ALL IC-BFM | IR  | 33.3 | 140 | 41.8 | 142 | 43.5 | 143 | *   | *   | 8 | I: febrile neutropenia, mild mucositis, transaminitis; IE: transaminitis, pelvic joint pain; C: mild mucositis, transaminitis; RI: febrile                                                                                             | DC              |                                                                                             |

|    |     |   |            |     |      |     |      |     |      |     |      |     |    |                                                                                                                                                                                             |                 |                                                                                             |
|----|-----|---|------------|-----|------|-----|------|-----|------|-----|------|-----|----|---------------------------------------------------------------------------------------------------------------------------------------------------------------------------------------------|-----------------|---------------------------------------------------------------------------------------------|
|    |     |   |            |     |      |     |      |     |      |     |      |     |    | neutropenia, sepsis, Clostridium enterocolitis, mild mucositis, transaminitis                                                                                                               |                 |                                                                                             |
| 12 | 3.9 | M | ALL IC-BFM | SR  | 16.8 | 107 | 18.2 | 107 | 22   | 107 | *    | *   | 6  | I: febrile neutropenia; RI: febrile neutropenia                                                                                                                                             | DC, PN          |                                                                                             |
| 13 | 7.3 | M | ALL IC-BFM | HR  | 28.4 | 131 | 33.5 | 131 | 34.2 | 131 | 36.5 | 138 | 9  | IE: febrile neutropenia; C: febrile neutropenia, severe mucositis, acute abdomen, transaminitis; RI: febrile neutropenia, PRES                                                              | DC              | ICU due to PRES                                                                             |
| 14 | 7.2 | F | ALL IC-BFM | HR  | 30   | 130 | 30   | 130 | 27.8 | 130 | 32   | 130 | 10 | I: febrile neutropenia, sepsis, cerebral ischemia, mucositis; C: febrile neutropenia, sepsis, IFI, mucositis, transaminitis; RI: febrile neutropenia, sepsis, IFI; mucositis, transaminitis | DC, EN, PN, NGT | ICU due to cerebral ischemia, sepsis and IFI                                                |
| 15 | 4   | F | ALL IC-BFM | IR  | 17.6 | 107 | 19.5 | 112 | 21   | 112 | 22.5 | 119 | 7  | IE: febrile neutropenia, pneumonia, IFI, transaminitis; RI: febrile neutropenia, mild mucositis, transaminitis                                                                              | DC, EN          |                                                                                             |
| 16 | 5.5 | F | ALL IC-BFM | HR  | 26   | 126 | 26   | 126 | N/A  | N/A | N/A  | N/A | 5  | I: febrile neutropenia, sepsis, pneumonia, IFI, PRES; C: febrile neutropenia, transaminitis                                                                                                 | DC              | ICU due to PRES; allogeneic hematopoietic stem cell transplant during 1st line chemotherapy |
| 17 | 0.8 | F | Interfant  | N/A | 10.3 | 78  | 10.8 | 80  | 10.8 | 81  | 15.3 | 96  | 6  | I: febrile neutropenia, sepsis, mild mucositis; C: febrile neutropenia, sepsis, severe mucositis                                                                                            | DC, EN, PN      | Relapse; death due to sepsis during                                                         |

|    |     |   |            |    |      |     |      |     |      |     |      |     |    |                                                                                                                                                                                                                                        |            |                                |
|----|-----|---|------------|----|------|-----|------|-----|------|-----|------|-----|----|----------------------------------------------------------------------------------------------------------------------------------------------------------------------------------------------------------------------------------------|------------|--------------------------------|
|    |     |   |            |    |      |     |      |     |      |     |      |     |    |                                                                                                                                                                                                                                        |            | the 2nd line therapy           |
| 18 | 7.6 | F | ALL IC-BFM | IR | 22.9 | 128 | 26.4 | 129 | 29.2 | 129 | 31.5 | 137 | 7  | I: febrile neutropenia, sepsis, mild mucositis, transaminitis; EI: febrile neutropenia, sepsis; RI: febrile neutropenia, mild mucositis, seizures                                                                                      | DC         | ICU due to seizures            |
| 19 | 8   | F | ALL IC-BFM | HR | 36   | 144 | 33.5 | 144 | 33.3 | 144 | *    | *   | 11 | I: febrile neutropenia, urinary infection, Clostridium enterocolitis, mild mucositis; EI: febrile neutropenia, sepsis, seizures; C: febrile neutropenia, sepsis, mild mucositis; RI: febrile neutropenia, sepsis, pneumonia, mucositis | DC, EN, PN | ICU due to seizures and sepsis |
| 20 | 3.1 | M | ALL IC-BFM | SR | 14.4 | 93  | 15   | 94  | 15.9 | 98  | 17.1 | 100 | 7  | I: febrile neutropenia, sepsis, mild mucositis, transaminitis, thrombosis; EI: febrile neutropenia, sepsis; C: febrile neutropenia, Clostridium enterocolitis; RI: febrile neutropenia, sepsis, Clostridium enterocolitis, IFI         | DC, EN     | ICU due to sepsis and IFI      |
| 21 | 2.9 | M | ALL-IC BFM | SR | 16.4 | 99  | 21.4 | 99  | 22   | 103 | 20.5 | 109 | 6  | EI: febrile neutropenia, sepsis, IFI; RI: febrile neutropenia, mild mucositis                                                                                                                                                          | DC         | ICU due to IFI                 |
| 22 | 3.1 | M | ALL-IC BFM | IR | 17   | 101 | 17.4 | 102 | 17.4 | 104 | 19   | 110 | 6  | I: febrile neutropenia, mild mucositis, mild pancreatitis; EI: febrile neutropenia; C:                                                                                                                                                 | DC, EN     |                                |

|    |      |   |                |    |      |     |      |     |      |     |      |     |    |                                                                                                                                                                                                                        |        |  |
|----|------|---|----------------|----|------|-----|------|-----|------|-----|------|-----|----|------------------------------------------------------------------------------------------------------------------------------------------------------------------------------------------------------------------------|--------|--|
|    |      |   |                |    |      |     |      |     |      |     |      |     |    | febrile neutropenia, sepsis;<br>RI: febrile neutropenia                                                                                                                                                                |        |  |
| 23 | 4.1  | F | ALL IC-<br>BFM | IR | 20   | 112 | 23.8 | 112 | 26.4 | 113 | 26   | 119 | 7  | I: febrile neutropenia, mild<br>mucositis, transaminitis; RI:<br>febrile neutropenia, mild<br>mucositis                                                                                                                | DC     |  |
| 24 | 3.4  | M | ALL IC-<br>BFM | IR | 18.5 | 113 | 21.5 | 113 | 21.8 | 113 | 22.5 | 118 | 6  | I: febrile neutropenia, mild<br>mucositis; EI: sepsis; RI:<br>febrile neutropenia, sepsis,<br>Clostridium enterocolitis,<br>severe electrolyte disorder                                                                | DC     |  |
| 25 | 14.8 | M | ALL IC-<br>BFM | HR | 47   | 172 | 42.4 | 173 | 50.2 | 176 | *    | *   | 10 | I: febrile neutropenia,<br>mucositis, hyperglycemia; C:<br>febrile neutropenia,<br>mucositis, hyperglycemia,<br>acute kidney injury, RI:<br>febrile neutropenia,<br>hyperglycemia, steroid<br>psychosis, iron overload | DC, EN |  |
| 26 | 3.9  | F | ALL IC-<br>BFM | IR | 18.5 | 110 | 21.2 | 113 | 21.8 | 114 | 20.6 | 122 | 7  | I: febrile neutropenia; EI:<br>febrile neutropenia, mild<br>mucositis, hypoglycemia; RI:<br>febrile neutropenia, sepsis                                                                                                | DC     |  |

**Legend:** age (years); sex (F-female, M-male); risk (SR-standard, IR-intermediate, HR-high); BW (kg) and BH (cm), body weight and body height (1-time point 1, 2- time point 2, 3- time point 3, 4- time point 4); duration (of treatment, months); adverse events (of interest; I- induction, EI- early intensification, C- consolidation, RE- reinduction); nutritional intervention (DC-dietary counselling, EN- enteral nutrition, PN- parenteral nutrition, NGT-nasogastric tube); additional comments (e.g. relapse, death, intensive care (ICU) admission, IFI (invasive fungal infection)...), N/A- not applicable; \*- data missing
